# Supplementary material for: Single crystal toroidal diamond anvils for high pressure experiments beyond 5 megabar
Source: PubMed Central journal article supplement (PMC6120914; doi:10.1038/s41467-018-06071-x), 2018-09-03
Supplement: 41467_2018_6071_MOESM1_ESM.pdf [file 41467_2018_6071_MOESM1_ESM.pdf]

SUPPLEMENTARY INFORMATION

# **Single crystal toroidal diamond anvils for high pressure experiments beyond 5 megabar**

Zs. Jenei et. al

## Supplementary Discussion

Having the most accurate EOS to determine the pressure of the sample is very important in high pressure experiments. Therefore, we chose an equation of state that has been calibrated against an EOS of Au derived from shock compression to 550 GPa. Moreover, the stress-strain conditions of our samples are more closely related to the conditions under which authors in ref. 1 have made their calibration. We recognize that this is not the latest EOS, however, the latest publication on Re EOS (Anzellini et al)<sup>1</sup> calibrated the fitting parameters up to 144 GPa. Sakai et al.<sup>2</sup> however, in the conclusion state, and we agree, that extrapolating EOSs to more than four times the calibration pressure is far beyond what is rationalized by experimental data. Additionally, we have collected x-ray diffraction data of Re and Pt and Re and Cu when compressed together (thin layer of Pt/thick Cu on Re at the center of the culet), up to 300 GPa (Supplementary Figure 1, and Supplementary Figure 2). As the two figures illustrate, up to 300 GPa there is good agreement between the used Re pressure scale versus the Pt scale, after Yokoo et al.<sup>3</sup> In case of Cu, there is a good agreement below 70 GPa and above 240 GPa, whereas in the intermediate pressures a large discrepancy in the pressure values is observed. It should be noted that the 4<sup>th</sup> order Birch-Murnaghan EOS does not yield us the highest pressure values (see Supplementary Table 1), however, based on what is available in the literature, we consider it to be the most suitable EOS for our experiments.

For comparison we listed the maximum pressures attained by three of our V3 diamonds with a list of equations of state in supplementary Table 1, see below. For completeness we also list our obtained cell parameter values for the two of the highest pressure runs in Supplementary Table 2, and Supplementary Table 3.

## Supplementary Note

Cell parameters in Supplementary Table 2 and Supplementary Table 3 were calculated as follows: We fit the individual 100, 101 and 110 diffraction peaks and obtained the  $d$ -spacings for these peaks and the standard deviation from the fitting. Then we calculate  $a_{100}$  and  $a_{110}$  parameter (and the standard deviation) of the hexagonal lattice from the  $d_{100}$  and  $d_{110}$ . Then we use the two  $a$  parameters and the  $d_{101}$  to calculate  $c_{100\&101}$  and  $c_{110\&101}$  parameters and standard deviation. The last step is to perform a least square procedure to obtain the  $a$  and  $c$  parameters and associated errors. These values are listed in the Supplementary Table 2 and Supplementary Table 3.

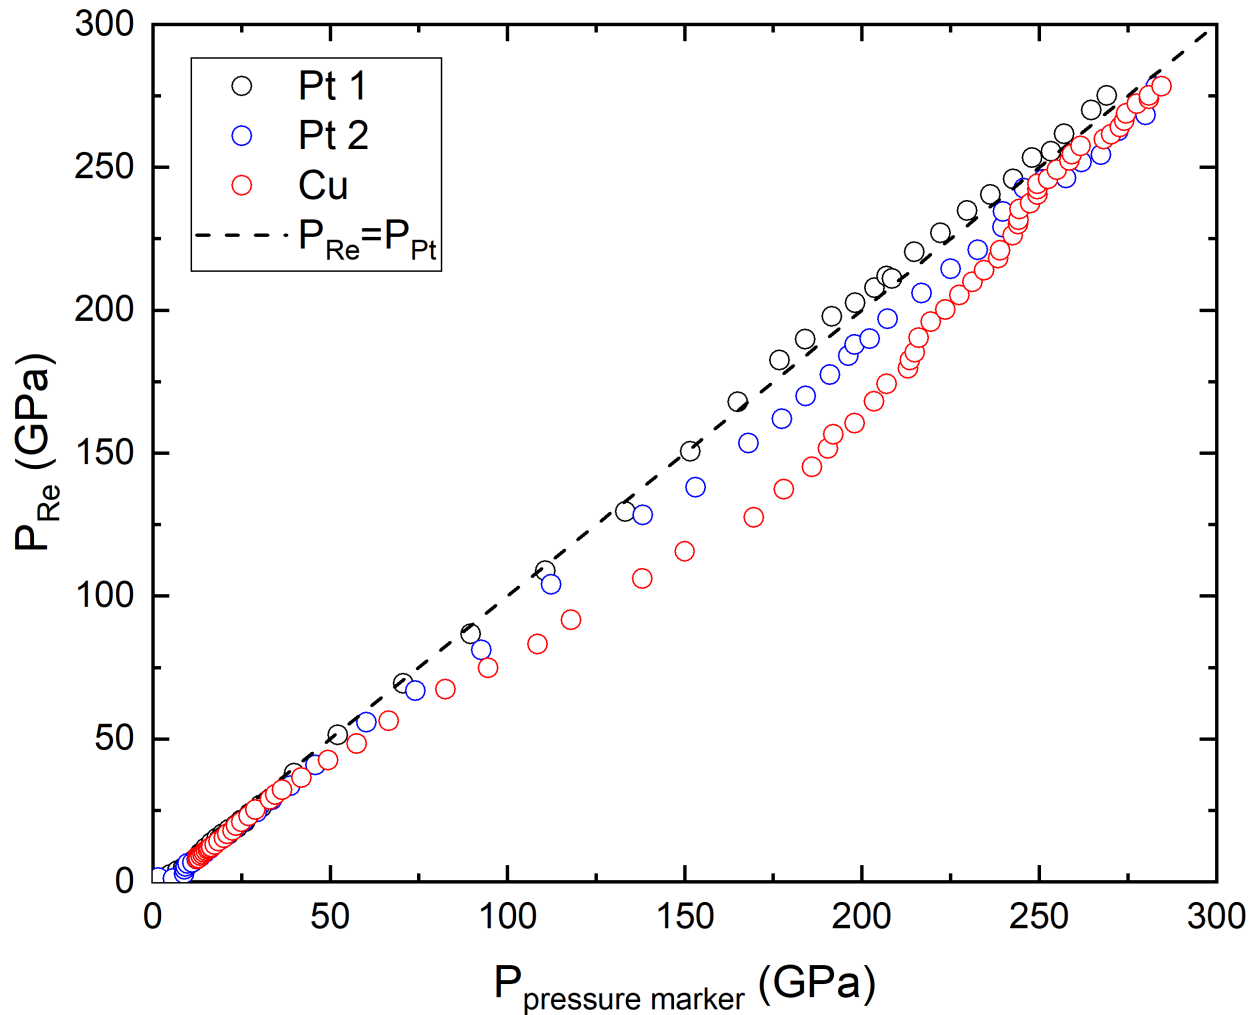

**Supplementary Figure 1.** Pressure of the central culet area determined by the Re scale reported by Dubrovinsky et al.<sup>4</sup> as a function of the pressure determined by the Pt scale reported by Yokoo et al.<sup>3</sup> and Cu scale reported by Holzapfel et al.<sup>5</sup>. The dashed line corresponds to  $P_{Re} = P_{Pt}$ . In one Pt experiment the maximum pressure determined by the Pt scale reported by Yokoo et al.<sup>3</sup> is less than 10 GPa higher than the pressure determined by the Re scale reported by Dubrovinsky et al.<sup>4</sup>. In the other Pt experiment the Re scale shows a pressure  $\sim 10$  GPa higher than the Pt scale. Also note that we compared the Pt scales of Holmes et al.<sup>6</sup> and Yokoo et al.<sup>3</sup> and the difference at the maximum pressure of both the Pt experiments is  $< 4$  GPa. In the Cu experiment the maximum pressure determined by Cu is  $\sim 10$  GPa higher than the Re pressure.

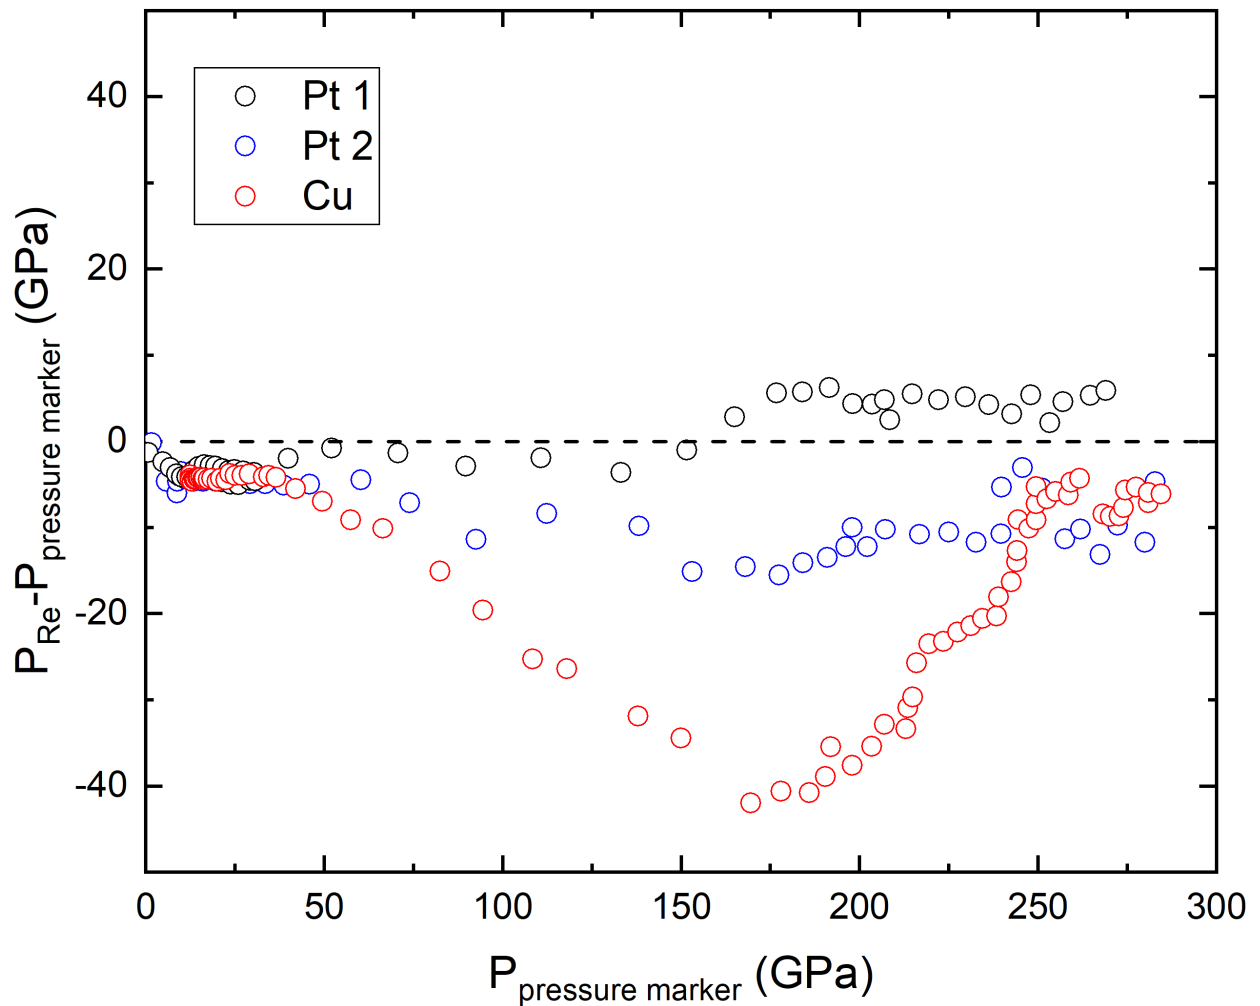

**Supplementary Figure 2.**  $P_{\text{Re}} - P_{\text{sample}}$  as a function of sample pressure determined by Pt Yokoo et al.<sup>3</sup>. Two of the three experiments show that the pressure determined by the EoS of Re reported by Dubrovinsky et al.<sup>4</sup> underestimates the maximum pressure by as much as ~10 GPa at the maximum pressure of these experiments. We note that in the lower pressure region, the Cu shows a large pressure difference, only to converge to near the Re-pressure values above 240 GPa.

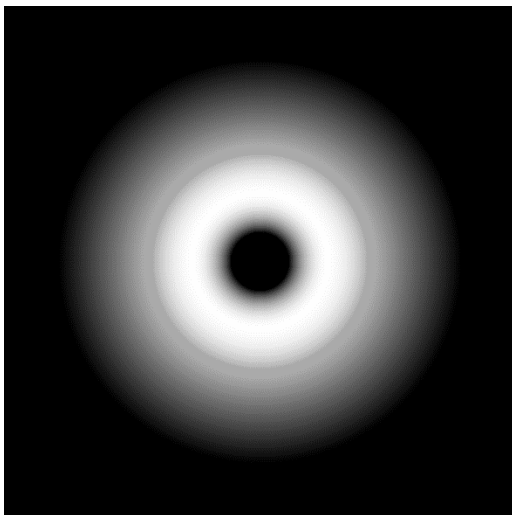

**Supplementary Figure 3.** Bitmap used to mill a typical toroidal diamond design used in this study.

**Supplementary Table 1.** The maximum pressure of three different experiments based on different Re EoS's reported in the literature.

| Reference                                          | EoS   | P-Range (GPa)         | K (GPa) | K'                | K''    | PTM       | Pressure Gauge | Method        | FD25 Max P (GPa) | FD35 Max P (GPa) | FD39 Max P (GPa) |
|----------------------------------------------------|-------|-----------------------|---------|-------------------|--------|-----------|----------------|---------------|------------------|------------------|------------------|
| Dubrovinsky et al (2012) <sup>4</sup>              | BM4   | 0-640                 | 342     | 6.15              | -0.029 | Ne/None   | Au             | XRD DAC       | 521(12)          | 542(15)          | 615(22)          |
| Dubrovinsky et al (2012) <sup>4</sup>              | BM3   | 0-165                 | 353     | 5.80              |        | Ne        | Au             | XRD DAC       | 508(6)           | 528(11)          | 596(19)          |
| Dubrovinsky et al (2012) <sup>4</sup>              | Vinet | 0-165                 | 348     | 6.07 <sup>a</sup> |        | Ne        | Au             | XRD DAC       | 528(10)          | 549(12)          | 620(20)          |
| Sikka, S. K., & Vijayakumar, V (1988) <sup>7</sup> | BM3   | Room P to V/Vo = 0.72 | 372     | 5.41              |        |           |                | LMTO          | 513(7)           | 529(12)          | 599(18)          |
| Manghnani et al. (1974) <sup>8</sup>               |       |                       | 360.3   | 5.43              |        |           |                | Ultrasonic    | 489(9)           | 506(10)          | 571(17)          |
| Jeanloz et al. (1991) <sup>9</sup>                 | BM4   | 0-170                 | 360.3   | 5.43              | -22.5  | 4:1, none | Ruby           | XRD DAC       | 486(8)           | 505(11)          | 568(17)          |
| Lv et al (2012) <sup>10</sup>                      | Vinet |                       | 376     | 4.58              |        |           |                | GGA-PBE       | 432(6)           | 447(8)           | 498(11)          |
| Anzellini et al (2014) <sup>1</sup>                | Vinet | 0-144                 | 352.6   | 4.56              |        | He        | Ruby, W, He    | XRD DAC       | 403(8)           | 447(8)           | 465(10)          |
| McQueen et al (1970) <sup>11</sup>                 | Vinet | 0-280                 | 365.2   | 4.35              |        |           |                | Reduced Shock | 398(6)           | 417(7)           | 458(9)           |
| Vohra et al. (1987) <sup>12</sup>                  | BM3   | 0-216                 | 372     | 4.05              |        | ?         | Ruby, Re       | XRD DAC       | 378(5)           | 390(8)           | 432(8)           |
| Liu et al. (1970) <sup>13</sup>                    | BM2   | 0-35                  | 336     | 4 <sup>b</sup>    |        | NaCl      | NaCl           | XRD DAC       | 335(5)           | 346(6)           | 384(7)           |

<sup>a</sup> The published value for  $K' = 7.57$  reported by <sup>1</sup> was modified by <sup>6</sup> to  $K' = 6.05$  because it was incompatible with the P-V data points reported by <sup>1</sup>. Note that using the published value of 7.57 for  $K'$  results in pressures over 7 Mbar.

<sup>b</sup> fixed parameter

**Supplementary Table 2.** Rhenium lattice parameters from experiment FD25 *a*-axis calculated from 100 and 110, *c*-axis calculated from 101, 100 and 101, 110 using a least squares procedure.

| <i>a</i> -axis (Å) | <i>a</i> error (Å) | <i>c</i> -axis (Å) | <i>c</i> error (Å) | Volume (Å <sup>3</sup> ) | Vol error (Å <sup>3</sup> ) |
|--------------------|--------------------|--------------------|--------------------|--------------------------|-----------------------------|
| 2.75072            | 0.00076            | 4.45081            | 0.00117            | 29.16508                 | 0.01787                     |
| 2.75124            | 0.00095            | 4.44877            | 0.00068            | 29.16262                 | 0.02056                     |
| 2.75131            | 0.00109            | 4.44406            | 0.00060            | 29.13325                 | 0.02333                     |
| 2.74921            | 0.00105            | 4.43191            | 0.00065            | 29.00937                 | 0.02259                     |
| 2.74716            | 0.00102            | 4.41294            | 0.00063            | 28.84208                 | 0.02175                     |
| 2.74648            | 0.00081            | 4.39812            | 0.00065            | 28.731                   | 0.01744                     |
| 2.74574            | 0.00080            | 4.39427            | 0.00067            | 28.69032                 | 0.01735                     |
| 2.74499            | 0.00079            | 4.39337            | 0.00070            | 28.66889                 | 0.01703                     |
| 2.74398            | 0.00066            | 4.3915             | 0.00068            | 28.63564                 | 0.01446                     |
| 2.74256            | 0.00074            | 4.38995            | 0.00069            | 28.59588                 | 0.01599                     |
| 2.74083            | 0.00068            | 4.38756            | 0.00069            | 28.54431                 | 0.01492                     |
| 2.73895            | 0.00070            | 4.38355            | 0.00074            | 28.47898                 | 0.01527                     |
| 2.73673            | 0.00056            | 4.38242            | 0.00073            | 28.42555                 | 0.0125                      |
| 2.73422            | 0.00037            | 4.38682            | 0.00063            | 28.40187                 | 0.00872                     |
| 2.73135            | 0.00040            | 4.39384            | 0.00065            | 28.38769                 | 0.00926                     |
| 2.72765            | 0.00043            | 4.408              | 0.00071            | 28.40211                 | 0.01                        |
| 2.71238            | 0.00083            | 4.37001            | 0.00085            | 27.84292                 | 0.01797                     |
| 2.66689            | 0.00245            | 4.33324            | 0.00098            | 26.69034                 | 0.04931                     |
| 2.6156             | 0.00345            | 4.5356             | 0.00295            | 26.87255                 | 0.07297                     |
| 2.48646            | 0.00084            | 4.1051             | 0.00182            | 21.97945                 | 0.01771                     |
| 2.47042            | 0.00101            | 4.04379            | 0.00161            | 21.37272                 | 0.01943                     |
| 2.4623             | 0.00113            | 4.03096            | 0.00162            | 21.16511                 | 0.02126                     |
| 2.45853            | 0.00073            | 4.02766            | 0.00170            | 21.08313                 | 0.0154                      |
| 2.45424            | 0.00082            | 4.01253            | 0.00180            | 20.93072                 | 0.01685                     |
| 2.44866            | 0.00123            | 3.99715            | 0.00137            | 20.75577                 | 0.02208                     |
| 2.44355            | 0.00142            | 3.98825            | 0.00162            | 20.62323                 | 0.02532                     |
| 2.43801            | 0.00146            | 3.97708            | 0.00153            | 20.47223                 | 0.0257                      |
| 2.43587            | 0.00071            | 3.9759             | 0.00156            | 20.43023                 | 0.01439                     |
| 2.43415            | 0.00050            | 3.98033            | 0.00179            | 20.42418                 | 0.0125                      |
| 2.43137            | 0.00073            | 3.9699             | 0.00173            | 20.32414                 | 0.01508                     |
| 2.42845            | 0.00079            | 3.96094            | 0.00137            | 20.22958                 | 0.01489                     |
| 2.42506            | 0.00069            | 3.96009            | 0.00168            | 20.16882                 | 0.01432                     |
| 2.42172            | 0.00054            | 3.96678            | 0.00158            | 20.14728                 | 0.01202                     |
| 2.41635            | 0.00071            | 3.95065            | 0.00161            | 19.97654                 | 0.01422                     |
| 2.41138            | 0.00050            | 3.94132            | 0.00156            | 19.84745                 | 0.01132                     |
| 2.40689            | 0.00062            | 3.92743            | 0.00150            | 19.7039                  | 0.01266                     |
| 2.40281            | 0.00050            | 3.9327             | 0.00137            | 19.66347                 | 0.01071                     |
| 2.401              | 0.00050            | 3.92391            | 0.00120            | 19.59002                 | 0.01006                     |
| 2.40036            | 0.00098            | 3.90996            | 0.00122            | 19.50985                 | 0.0171                      |
| 2.39748            | 0.00094            | 3.90108            | 0.00090            | 19.41894                 | 0.01581                     |
| 2.39521            | 0.00107            | 3.89657            | 0.00116            | 19.35984                 | 0.01822                     |
| 2.39332            | 0.00101            | 3.89413            | 0.00114            | 19.31714                 | 0.01719                     |

**Supplementary Table 3.** Rhenium lattice parameters from experiment FD39 *a*-axis calculated from 100 and 110, *c*-axis calculated from 101, 100 and 101, 110 using a least squares procedure.

| <i>a</i> -axis (Å) | <i>a</i> error (Å) | <i>c</i> -axis (Å) | <i>c</i> error (Å) | Volume (Å <sup>3</sup> ) | Vol error (Å <sup>3</sup> ) |
|--------------------|--------------------|--------------------|--------------------|--------------------------|-----------------------------|
| 2.76158            | 0.00371            | 4.40839            | 0.00102            | 29.11555                 | 0.02062                     |
| 2.75522            | 0.00034            | 4.44427            | 0.00084            | 29.2176                  | 0.01848                     |
| 2.74681            | 0.00425            | 4.48746            | 0.00099            | 29.32174                 | 0.01946                     |
| 2.75091            | 0.00085            | 4.44354            | 0.00084            | 29.12134                 | 0.01301                     |
| 2.74819            | 0.00072            | 4.44005            | 0.00076            | 29.04113                 | 0.01492                     |
| 2.74553            | 0.00082            | 4.43252            | 0.00065            | 28.9357                  | 0.01324                     |
| 2.74394            | 0.00129            | 4.42515            | 0.00063            | 28.85408                 | 0.01273                     |
| 2.74167            | 0.00109            | 4.41483            | 0.00066            | 28.73919                 | 0.01322                     |
| 2.74015            | 0.00109            | 4.4093             | 0.00074            | 28.67138                 | 0.01553                     |
| 2.73855            | 0.00093            | 4.41014            | 0.00081            | 28.64349                 | 0.01733                     |
| 2.73702            | 0.00073            | 4.40529            | 0.00065            | 28.57991                 | 0.01397                     |
| 2.73563            | 0.00068            | 4.40389            | 0.00072            | 28.54175                 | 0.01549                     |
| 2.73347            | 0.00042            | 4.4044             | 0.00075            | 28.50003                 | 0.01569                     |
| 2.73211            | 0.00041            | 4.40123            | 0.00073            | 28.45122                 | 0.01437                     |
| 2.73029            | 0.00052            | 4.3999             | 0.00082            | 28.40487                 | 0.01484                     |
| 2.72884            | 0.00059            | 4.39464            | 0.00069            | 28.34074                 | 0.01313                     |
| 2.72711            | 0.00035            | 4.39169            | 0.00062            | 28.28579                 | 0.01224                     |
| 2.72494            | 0.00030            | 4.38784            | 0.00060            | 28.21609                 | 0.01245                     |
| 2.72247            | 0.00045            | 4.38297            | 0.00069            | 28.1336                  | 0.01494                     |
| 2.71942            | 0.00076            | 4.37413            | 0.00058            | 28.01398                 | 0.01285                     |
| 2.71772            | 0.00086            | 4.37006            | 0.00060            | 27.95286                 | 0.01335                     |
| 2.71516            | 0.00060            | 4.36229            | 0.00067            | 27.85076                 | 0.01396                     |
| 2.71289            | 0.00092            | 4.35357            | 0.00076            | 27.7486                  | 0.01634                     |
| 2.71071            | 0.00143            | 4.3375             | 0.00104            | 27.60174                 | 0.02117                     |
| 2.70795            | 0.00085            | 4.32994            | 0.00118            | 27.49758                 | 0.02462                     |
| 2.70268            | 0.00065            | 4.32058            | 0.00150            | 27.33149                 | 0.03187                     |
| 2.70006            | 0.00436            | 4.28517            | 0.00253            | 27.05487                 | 0.04942                     |
| 2.70361            | 0.00204            | 4.31133            | 0.00147            | 27.29159                 | 0.02967                     |
| 2.70283            | 0.00255            | 4.30675            | 0.00226            | 27.24691                 | 0.04419                     |
| 2.70545            | 0.00111            | 4.37758            | 0.00200            | 27.74871                 | 0.04291                     |
| 2.59151            | 0.00056            | 4.12256            | 0.00203            | 23.97741                 | 0.01566                     |
| 2.53587            | 0.00068            | 4.13578            | 0.00195            | 23.03251                 | 0.0165                      |
| 2.532              | 0.00055            | 4.07468            | 0.00134            | 22.623                   | 0.01235                     |
| 2.54672            | 0.04566            | 4.07668            | 0.00131            | 22.89801                 | 0.82104                     |
| 2.53318            | 0.00018            | 4.06345            | 0.00102            | 22.58176                 | 0.00648                     |
| 2.52646            | 0.00031            | 4.04649            | 0.00146            | 22.36832                 | 0.0098                      |
| 2.52514            | 0.00412            | 4.0579             | 0.00074            | 22.40794                 | 0.07325                     |
| 2.5238             | 0.00326            | 4.06342            | 0.00097            | 22.41464                 | 0.0581                      |
| 2.5098             | 0.00326            | 4.0486             | 0.00110            | 22.08578                 | 0.05776                     |
| 2.49874            | 0.00132            | 4.00708            | 0.00065            | 21.66707                 | 0.02318                     |
| 2.49403            | 0.00229            | 4.00509            | 0.00058            | 21.57471                 | 0.03976                     |
| 2.48496            | 0.00145            | 3.99039            | 0.00063            | 21.33955                 | 0.02519                     |
| 2.47757            | 0.00174            | 3.9779             | 0.00085            | 21.14649                 | 0.03009                     |
| 2.47205            | 0.00172            | 3.96621            | 0.00094            | 20.99041                 | 0.02966                     |

|         |         |         |         |          |         |
|---------|---------|---------|---------|----------|---------|
| 2.46645 | 0.00226 | 3.95427 | 0.00081 | 20.83248 | 0.03841 |
| 2.46228 | 0.00166 | 3.94695 | 0.00081 | 20.72363 | 0.02828 |
| 2.45772 | 0.00118 | 3.93189 | 0.00079 | 20.56814 | 0.02023 |
| 2.45435 | 0.00108 | 3.92743 | 0.00091 | 20.48866 | 0.0187  |
| 2.45134 | 0.00093 | 3.92203 | 0.00085 | 20.41033 | 0.01609 |
| 2.4472  | 0.00099 | 3.90523 | 0.00089 | 20.25428 | 0.01701 |
| 2.44164 | 0.00117 | 3.89619 | 0.00099 | 20.11564 | 0.01993 |
| 2.43838 | 0.00113 | 3.8902  | 0.00102 | 20.0312  | 0.01935 |
| 2.43476 | 0.00288 | 3.88347 | 0.00098 | 19.93709 | 0.0475  |
| 2.43101 | 0.00089 | 3.87892 | 0.00105 | 19.85247 | 0.01546 |
| 2.42848 | 0.00264 | 3.86503 | 0.00116 | 19.74019 | 0.0433  |
| 2.4254  | 0.00287 | 3.86478 | 0.00105 | 19.68892 | 0.04687 |
| 2.42335 | 0.00403 | 3.8576  | 0.00132 | 19.6191  | 0.06568 |
| 2.41872 | 0.00066 | 3.86815 | 0.00130 | 19.59767 | 0.01253 |
| 2.41531 | 0.00056 | 3.86646 | 0.00125 | 19.53392 | 0.01107 |
| 2.41292 | 0.00090 | 3.8648  | 0.00131 | 19.48688 | 0.01599 |
| 2.41181 | 0.00288 | 3.85807 | 0.00149 | 19.43515 | 0.047   |
| 2.40927 | 0.00245 | 3.85497 | 0.00154 | 19.37856 | 0.04018 |
| 2.40765 | 0.00272 | 3.85648 | 0.00140 | 19.3601  | 0.04432 |
| 2.40577 | 0.00293 | 3.84986 | 0.00154 | 19.29678 | 0.04767 |
| 2.4018  | 0.00263 | 3.84319 | 0.00140 | 19.19985 | 0.04258 |
| 2.39932 | 0.00423 | 3.8394  | 0.00172 | 19.14124 | 0.068   |
| 2.39656 | 0.00180 | 3.83306 | 0.00163 | 19.06566 | 0.02971 |
| 2.39482 | 0.00229 | 3.82858 | 0.00156 | 19.01577 | 0.03726 |
| 2.39531 | 0.00159 | 3.83326 | 0.00174 | 19.04682 | 0.02671 |
| 2.39252 | 0.00087 | 3.82344 | 0.00152 | 18.9538  | 0.01567 |
| 2.39094 | 0.00147 | 3.80922 | 0.00150 | 18.85832 | 0.02443 |
| 2.38932 | 0.00065 | 3.80842 | 0.00170 | 18.82888 | 0.01321 |
| 2.38704 | 0.00117 | 3.80624 | 0.00141 | 18.78221 | 0.01968 |
| 2.38413 | 0.00073 | 3.81248 | 0.00159 | 18.76721 | 0.01389 |
| 2.38363 | 0.00190 | 3.80907 | 0.00119 | 18.74258 | 0.03042 |
| 2.38192 | 0.00092 | 3.80681 | 0.00102 | 18.70448 | 0.01526 |
| 2.38097 | 0.00076 | 3.79601 | 0.00113 | 18.63649 | 0.01309 |
| 2.37906 | 0.00072 | 3.79868 | 0.00091 | 18.61982 | 0.0121  |
| 2.37906 | 0.00072 | 3.79868 | 0.00091 | 18.61982 | 0.0121  |

---



## Supplementary References

- 1 Anzellini, S., Dewaele, A., Occelli, F., Loubeyre, P. & Mezouar, M. Equation of state of rhenium and application for ultra high pressure calibration. *Journal of Applied Physics* **115**, 6, (2014).
- 2 Sakai, T. *et al.* High pressure generation using double-stage diamond anvil technique: problems and equations of state of rhenium. *High Pressure Research* **38**, 107-119, (2018).
- 3 Yokoo, M. *et al.* Ultrahigh-pressure scales for gold and platinum at pressures up to 550 GPa. *Physical Review B* **80**, (2009).
- 4 Dubrovinsky, L., Dubrovinskaia, N., Prakapenka, V. B. & Abakumov, A. M. Implementation of micro-ball nanodiamond anvils for high-pressure studies above 6 Mbar. *Nature Communications* **3**, 7 (2012).
- 5 Holzapfel, W. B. & Nicol, M. F. Refined equations of state for Cu, Ag, and Au in the sub-TPa region. *High Pressure Research* **27**, 377-392 (2007).
- 6 Holmes, N. C., Moriarty, J. A., Gathers, G. R. & Nellis, The equation of state of platinum to 660 GPa (6.6 Mbar). *Journal of Applied Physics* **66**, 2962-2967 (1989).
- 7 Sikka, S. K. & Vijayakumar, V. Theoretical isothermal equation of state of rhenium. *Physical Review B* **38**, 10926-10928 (1988).
- 8 Takemura, K. in *Proceedings of AIRAPT-17*. (ed W.J. Nellis M.H. manghnani, M.F. Nicol) 443-444 (University Press).
- 9 Jeanloz, R., Godwal, B. K. & Meade, C. Static strength and equation of state of rhenium at ultra-high pressures. *Nature* **349**, 687-689, (1991).
- 10 Lv, M.-B., Cheng, Y., Qi, Y.-Y., Ji, G.-F. & Piao, C.-G. Elastic properties and phonon dispersions of rhenium in hexagonal-close-packed structure under pressure from first principles. *Physica B-Condensed Matter* **407**, 778-783 (2012).
- 11 McQueen, R. G., Marsh, S. P., Tayler, J. W., Fritz, J. N. & Carter, W. J. *High-Velocity Impact Phenomena*. (Academic, 1970).
- 12 Vohra, Y. K., Duclos, S. J. & Ruoff, A. L. High Pressure x-ray diffraction studies on rhenium to 216 GPa (2.16 Mbar). *Physical Review B* **36**, 9790-9792 (1987).
- 13 Liu, L. G., Takahashi, T. & Bassett, W. A. Effect of pressure and temperature on lattice parameters of rhenium. *Journal of Physics and Chemistry of Solids* **31**, 1345 (1970).
